# Supplementary material for: Presence and Levels of Galactosyllactoses and Other Oligosaccharides in Human Milk and Their Variation during Lactation and According to Maternal Phenotype
Source: MDPI journal article supplement (doi:10.3390/nu13072324), 2021-07-06
Supplement: s1 [file s1]

## Supplementary methods

### *Analysis of human milk oligosaccharides*

The composition of each individual HM sample with regard to its HMOS was qualitatively and quantitatively determined using highly sensitive multiplexed capillary-gel-electrophoresis with laser-induced-fluorescence detection (xCGE-LIF) [1] as described in the Supplementary methods.

In brief and in accordance with the glyXera GmbH kit protocol (KIT-glyX-Quant-DPV, glyXera GmbH, Magdeburg, Germany), the pure HM samples were diluted 1:100 and then spiked with an internal standard (IS) (oligosaccharide quantification standard solution, OS-A5-N-1mL-01, glyXera GmbH, Magdeburg, Germany). For this step, 2  $\mu$ L of an IS solution and 3  $\mu$ L of ultrapure water [2] were added to 20  $\mu$ L of each diluted HM sample. Subsequently, the IS spiked samples were treated with denaturation solution (C-DeNatSol-100uL-01, glyXera GmbH, Magdeburg, Germany). Next, the free oligosaccharides within the denaturized HM/IS samples, comprising the free HMOS and IS, were labeled with APTS dye (KIT-glyX-OSP-A-96-01, glyXera GmbH, Magdeburg, Germany). Afterwards, the excess of APTS (not reacted) and salt were removed using hydrophilic interaction chromatography solid phase extraction (HILIC-SPE, in accordance with the glyXera GmbH kit protocol KIT-glyX-OS.H-APTS-96-01, glyXera GmbH, Magdeburg, Germany). In the next step, the purified APTS-labeled oligosaccharides (HILIC-SPE eluates) were analyzed via xCGE-LIF in accordance with the glyXera GmbH measurement kit protocol (KIT-glyX-OS.M-96-01, glyXera GmbH, Magdeburg, Germany). Finally, data processing, analysis, and qualitative evaluation of the HMOS *Fingerprints* (normalized electropherograms) were performed via glyXtool™ software (version 5.3.1, glyXera GmbH, Magdeburg, Germany), and data analysis and quantitative evaluation of the HMOS *Fingerprints* was performed via glyXtoolGUI™ software (Beta v0.4 [r166+], glyXera GmbH, Magdeburg, Germany).

The limit of quantification (LOQ) was determined using the signal-to-noise ratio (S/N) of each HMOS *Fingerprint* that was calculated according to Ullsten et al. [3]. The LOQ was defined at an S/N of 10. The respective noise within each sample was determined after the migration time alignment of the unsmoothed data in the late migration time range (approximation range = degree of polymerization (DP)  $18 < DP < 20$ ). Consequently, the LOQ is specific with regard to each sample and measurement. All HMOS-peaks  $\geq$  LOQ were taken into account and their IS-normalized peak areas were calculated.

For the low-abundant GLs (i.e.  $\beta 6'$ -,  $\beta 4'$ -,  $\beta 3'$ -, and  $\alpha 3'$ -GL), which were of particular interest in this study, the relative and absolute levels were determined down to the limit of detection (LOD), defined at an S/N of 3. Absolute concentrations (*c*) were determined according to the following formula: *c* = IS-normalized peak height of the analyte  $\times$  concentration of IS  $\times$  dilution factor  $\times$  response factor (KIT-glyX-Quant-DPV, glyXera GmbH, Magdeburg, Germany).

**Supplemental Table S1.** Overview of the number of human milk (HM) samples collected at different time-points over the first 4 months (middle column) and for the subset of 24 Dutch women over the first 12 months (right column) of lactation.

| Lactation month      | First 4 months<br>Number of HM samples | First 12 months (Dutch<br>subset)<br>Number of HM samples |
|----------------------|----------------------------------------|-----------------------------------------------------------|
| 1 month postpartum   | 240                                    | 21                                                        |
| 2 months postpartum  | 92                                     | 24                                                        |
| 3 months postpartum  | 54                                     | 23                                                        |
| 4 months postpartum  | 249                                    | 23                                                        |
| 5 months postpartum  | -                                      | 23                                                        |
| 6 months postpartum  | -                                      | 21                                                        |
| 7 months postpartum  | -                                      | 12                                                        |
| 8 months postpartum  | -                                      | 9                                                         |
| 9 months postpartum  | -                                      | 7                                                         |
| 10 months postpartum | -                                      | 4                                                         |
| 11 months postpartum | -                                      | 2                                                         |
| 12 months postpartum | -                                      | 2                                                         |
| <b>Total</b>         | 635 (371 donors)                       | 171 (24 donors)                                           |

**Supplemental Table S2.** Total peak area of the selected human milk oligosaccharides (HMOS) (nTPA) and relative peak area (rPA, %) of the HMOS (median (Q1-Q3)) according to maternal human milk (HM) group [4–6] in HM samples (n=171) collected longitudinally over the first year postpartum from 24 Dutch mothers (Dutch subset).

|                     | HM Group I<br>( <i>n</i> = 126 Samples,<br>18 Donors)<br><i>median (Q1-Q3)</i> | HM Group II<br>( <i>n</i> = 21 Samples,<br>3 Donors)<br><i>median (Q1-Q3)</i> | HM Group III<br>( <i>n</i> = 15 Samples,<br>2 Donors)<br><i>median (Q1-Q3)</i> | HM Group IV<br>( <i>n</i> = 9 Samples,<br>1 Donor)<br><i>median (Q1-Q3)</i> |
|---------------------|--------------------------------------------------------------------------------|-------------------------------------------------------------------------------|--------------------------------------------------------------------------------|-----------------------------------------------------------------------------|
| nTPA <sup>1</sup>   | 11.4 (9.33-13.4) <sup>a</sup>                                                  | 9.30 (7.53-10.8) <sup>b</sup>                                                 | 9.95 (8.51-10.7) <sup>a,b</sup>                                                | 6.22 (5.27-9.83) <sup>b</sup>                                               |
|                     | <b>rPA (%)</b>                                                                 |                                                                               |                                                                                |                                                                             |
| 2'-FL               | 22.2 (15.0-29.5) <sup>a</sup>                                                  | 0.00 (0.00-0.00) <sup>2 b</sup>                                               | 42.0 (35.5-53.0) <sup>c</sup>                                                  | 0.00 (0.00-0.00) <sup>2 b</sup>                                             |
| 3-FL                | 11.7 (5.53-21.4) <sup>a</sup>                                                  | 35.9 (26.4-45.3) <sup>b</sup>                                                 | 0.00 (0.00-3.38) <sup>c</sup>                                                  | 6.78 (3.04-7.31) <sup>d</sup>                                               |
| DFL                 | 1.86 (1.29-2.50) <sup>a</sup>                                                  | 0.00 (0.00-0.00) <sup>2 b</sup>                                               | 1.01 (0.62-1.48) <sup>a</sup>                                                  | 0.00 (0.00-0.00) <sup>2 b</sup>                                             |
| LNT                 | 10.6 (7.87-13.1) <sup>a</sup>                                                  | 15.3 (11.3-20.6) <sup>b</sup>                                                 | 9.77 (6.50-13.8) <sup>a</sup>                                                  | 51.8 (47.8-59.3) <sup>c</sup>                                               |
| LNnT                | 0.98 (0.67-1.48) <sup>a</sup>                                                  | 0.66 (0.00-0.91) <sup>b</sup>                                                 | 1.21 (0.83-1.78) <sup>a</sup>                                                  | 1.35 (0.94-1.89) <sup>a,b</sup>                                             |
| LNFP I+V            | 7.56 (3.29-12.5) <sup>a</sup>                                                  | 1.51 (1.36-1.63) <sup>2 b</sup>                                               | 18.8 (15.6-21.5) <sup>c</sup>                                                  | 1.29 (1.16-1.55) <sup>2 b</sup>                                             |
| LNFP II             | 5.79 (3.31-9.01) <sup>a</sup>                                                  | 19.7 (17.1-21.2) <sup>b</sup>                                                 | 0.00 (0.00-0.00) <sup>2 c</sup>                                                | 0.00 (0.00-0.00) <sup>2 c</sup>                                             |
| LNFP III            | 7.52 (5.66-9.12) <sup>a</sup>                                                  | 9.28 (8.06-10.6) <sup>b</sup>                                                 | 8.94 (6.99-12.3) <sup>a,b</sup>                                                | 15.6 (10.1-18.4) <sup>b</sup>                                               |
| LNDFH I             | 16.3 (13.5-19.1) <sup>a</sup>                                                  | 0.00 (0.00-0.00) <sup>2 b</sup>                                               | 0.00 (0.00-0.00) <sup>2 b</sup>                                                | 0.00 (0.00-0.00) <sup>2 b</sup>                                             |
| LNDFH II            | 0.00 (0.00-0.00) <sup>2 a</sup>                                                | 3.50 (2.87-4.16) <sup>b</sup>                                                 | 0.00 (0.00-0.00) <sup>2 a</sup>                                                | 0.00 (0.00-0.00) <sup>2 a</sup>                                             |
| 3'-SL               | 1.08 (0.78-1.43) <sup>a</sup>                                                  | 1.37 (1.04-1.91) <sup>b</sup>                                                 | 1.18 (1.04-2.15) <sup>a,b</sup>                                                | 1.76 (1.05-2.21) <sup>c</sup>                                               |
| 6'-SL               | 0.83 (0.47-1.64) <sup>a</sup>                                                  | 0.70 (0.50-1.64) <sup>a</sup>                                                 | 0.91 (0.37-1.62) <sup>a</sup>                                                  | 1.74 (0.66-2.71) <sup>a</sup>                                               |
| DSLNT               | 1.97 (1.40-2.47) <sup>a</sup>                                                  | 3.20 (2.86-3.71) <sup>b</sup>                                                 | 2.95 (1.94-4.10) <sup>a,b</sup>                                                | 5.53 (5.00-8.83) <sup>c</sup>                                               |
| LSTa                | 0.00 (0.00-0.20) <sup>a</sup>                                                  | 0.00 (0.00-0.21) <sup>a</sup>                                                 | 0.00 (0.00-0.21) <sup>a</sup>                                                  | 0.78 (0.75-0.93) <sup>b</sup>                                               |
| LSTb                | 0.92 (0.68-1.08) <sup>a</sup>                                                  | 1.43 (1.29-1.89) <sup>b</sup>                                                 | 0.64 (0.51-0.98) <sup>a</sup>                                                  | 2.36 (2.18-2.72) <sup>c</sup>                                               |
| LSTc                | 0.34 (0.00-0.84) <sup>a</sup>                                                  | 0.28 (0.00-0.77) <sup>a</sup>                                                 | 0.26 (0.00-0.57) <sup>a</sup>                                                  | 0.99 (0.27-1.60) <sup>a</sup>                                               |
| 3'-F-LNH            | 2.38 (1.42-3.85) <sup>a</sup>                                                  | 3.65 (0.76-6.23) <sup>ab</sup>                                                | 2.51 (1.44-3.94) <sup>a</sup>                                                  | 7.46 (4.94-8.41) <sup>b</sup>                                               |
| 2'-F-LNH            | 0.00 (0.00-0.00) <sup>2 a</sup>                                                | 0.00 (0.00-0.00) <sup>2 a</sup>                                               | 0.00 (0.00-0.00) <sup>2 a</sup>                                                | 0.00 (0.00-0.00) <sup>2 a</sup>                                             |
| β3'-GL <sup>3</sup> | 0.074 (0.049-0.12) <sup>a</sup>                                                | 0.10 (0.080-0.13) <sup>a</sup>                                                | 0.11 (0.00-0.13) <sup>a</sup>                                                  | 0.42 (0.38-0.51) <sup>b</sup>                                               |
| β6'-GL <sup>3</sup> | 0.36 (0.25-0.53) <sup>a</sup>                                                  | 0.52 (0.44-0.61) <sup>b</sup>                                                 | 0.42 (0.38-1.01) <sup>ab</sup>                                                 | 1.07 (0.87-1.36) <sup>c</sup>                                               |
| α3'-GL <sup>3</sup> | 0.00 (0.00-0.00) <sup>2 a</sup>                                                | 0.00 (0.00-0.00) <sup>2 a</sup>                                               | 0.00 (0.00-0.00) <sup>2 a</sup>                                                | 0.00 (0.00-0.00) <sup>2 a</sup>                                             |

<sup>1</sup> Displayed as the internal standard (IS)-normalized total peak area of selected HMOS (nTPA); <sup>2</sup> '0.00' does not necessarily mean that the respective HMOS is not present at any level, but it means that any amount of HMOS present is below the limit of quantification (LOQ); <sup>3</sup> For β6'-GL, β3'-GL and α3'-GL, the limit of

detection was defined at a signal-to-noise ratio (S/N) of 3. For all other HMOS, the limit of quantification was defined at a S/N of 10; <sup>a,b,c and d</sup> Different superscript letters indicate statistical significance (p<0.05). Significance values have been adjusted by the Bonferroni correction for multiple tests.

Abbreviations used: 2'-FL: 2'-fucosyllactose; 3-FL: 3-fucosyllactose; DFL: difucosyllactose; LNT: lacto-N-tetraose; LNnT: lacto-N-neotetraose; LNFP I: lacto-N-fucopentaose I; LNFP II: lacto-N-fucopentaose II; LNFP III: lacto-N-fucopentaose III; LNFP V: lacto-N-fucopentaose V; LNDFH I: lacto-N-difucohexaose I; LNDFH II: lacto-N-difucohexaose II; 3'-SL: 3-sialyllactose; 6'-SL: 6-sialyllactose; DSLNT: disialyllacto-N-tetraose; LSTa: sialyl-lacto-N-tetraose a; LSTb: sialyl-lacto-N-tetraose b; LSTc: sialyl-lacto-N-tetraose c; 2'-F-LNH: 2'-fucosyllacto-N-hexaose; 3'-F-LNH: 3'-fucosyllacto-N-hexaose;  $\beta$ 3'-GL:  $\beta$ 3'-galactosyllactose;  $\beta$ 6'-GL:  $\beta$ 6'-galactosyllactose;  $\alpha$ 3'-GL:  $\alpha$ 3'-galactosyllactose.

**Supplemental Table S3.** Percentage of human milk (HM) samples (n=635) in which the specific human milk oligosaccharide (HMOS) was detected (Presence, % of total) and relative peak area (rPA, %) of the selected HMOS (median (Q1-Q3)) according to maternal HM group [4-6]. HM samples were collected in the first 4 months postpartum from 371 donors. Three samples could not be assigned to a HM group and are for this reason not depicted in this table.

|          | HM Group I<br>(n = 420 Samples,<br>241 Donors) |                               | HM Group II<br>(n = 137 Samples,<br>83 Donors) |                                 | HM Group III<br>(n = 53 Samples,<br>32 Donors) |                                 | HM Group IV<br>(n = 22 Samples,<br>14 Donors) |                                   |
|----------|------------------------------------------------|-------------------------------|------------------------------------------------|---------------------------------|------------------------------------------------|---------------------------------|-----------------------------------------------|-----------------------------------|
|          | Presence<br>% of total <sup>1</sup>            | rPA (%)<br>median (Q1-Q3)     | Presence<br>% of total <sup>1</sup>            | rPA (%)<br>median (Q1-Q3)       | Presence<br>% of total <sup>1</sup>            | rPA (%)<br>median (Q1-Q3)       | Presence<br>% of total <sup>1</sup>           | rPA (%)<br>median (Q1-Q3)         |
| 2'-FL    | 100                                            | 23.2 (18.4-29.0) <sup>a</sup> | 0                                              | -                               | 100                                            | 40.9 (34.2-48.9) <sup>b</sup>   | 0                                             | -                                 |
| 3-FL     | 95                                             | 7.76 (4.17-14.5) <sup>a</sup> | 100                                            | 28.4 (17.2-35.8) <sup>b</sup>   | 15                                             | 2.86 (2.47-4.18) <sup>c</sup>   | 100                                           | 6.25 (4.03-11.3) <sup>a</sup>     |
| DFL      | 100                                            | 1.61 (1.13-2.20) <sup>a</sup> | 4.4                                            | 0.44 (0.25-0.65) <sup>b</sup>   | 89                                             | 0.68 (0.54-1.15) <sup>c</sup>   | 4.5                                           | 1.29 (1.29-1.29) <sup>b</sup>     |
| LNT      | 100                                            | 11.9 (9.20-14.6) <sup>a</sup> | 99                                             | 19.3 (14.6-26.5) <sup>b</sup>   | 100                                            | 11.8 (9.10-13.8) <sup>a</sup>   | 100                                           | 51.8 (46.4-56.7) <sup>c</sup>     |
| LNnT     | 99                                             | 1.45 (1.03-2.06) <sup>a</sup> | 85                                             | 0.78 (0.54-1.26) <sup>b</sup>   | 98                                             | 1.10 (0.83-1.54) <sup>c</sup>   | 95                                            | 1.04 (0.45-1.50) <sup>a,b,c</sup> |
| LNFP II  | 100                                            | 5.14 (3.58-7.34) <sup>a</sup> | 100                                            | 20.6 (17.6-25.4) <sup>b</sup>   | 3.8                                            | 0.18 (0.13- .) <sup>2 c</sup>   | 0                                             | -                                 |
| LNFP III | 100                                            | 6.81 (4.62-8.83) <sup>a</sup> | 100                                            | 9.25 (7.30-11.3) <sup>b</sup>   | 100                                            | 6.44 (3.85-8.49) <sup>a</sup>   | 100                                           | 14.3 (9.58-18.0) <sup>c</sup>     |
| LNFP I+V | 100                                            | 9.69 (6.00-14.0) <sup>a</sup> | 100                                            | 1.65 (1.39-1.97) <sup>b</sup>   | 100                                            | 24.9 (19.3-31.5) <sup>c</sup>   | 100                                           | 1.60 (1.32-2.36) <sup>b</sup>     |
| LNDFH I  | 100                                            | 17.4 (14.9-20.2) <sup>a</sup> | 1.5                                            | 1.44 (0.043- .) <sup>2 b</sup>  | 3.8                                            | 0.59 (0.46- .) <sup>2 b</sup>   | 0                                             | -                                 |
| LNDFH II | 2.1                                            | 1.25 (0.99-1.59) <sup>a</sup> | 100                                            | 3.77 (2.84-4.88) <sup>b</sup>   | 0                                              | -                               | 0                                             | -                                 |
| 3'-SL    | 100                                            | 0.89 (0.70-1.07) <sup>a</sup> | 100                                            | 1.00 (0.82-1.25) <sup>b</sup>   | 98                                             | 0.95 (0.77-1.22) <sup>a,b</sup> | 100                                           | 1.45 (1.09-1.63) <sup>c</sup>     |
| 6'-SL    | 100                                            | 1.22 (0.76-2.23) <sup>a</sup> | 100                                            | 1.58 (0.92-2.67) <sup>a,b</sup> | 98                                             | 1.35 (0.89-2.52) <sup>a</sup>   | 100                                           | 2.42 (1.80-3.45) <sup>b</sup>     |
| DSLNT    | 100                                            | 1.71 (1.33-2.27) <sup>a</sup> | 99                                             | 2.37 (1.72-3.14) <sup>b</sup>   | 98                                             | 1.94 (1.33-2.48) <sup>a,b</sup> | 100                                           | 4.09 (3.22-5.05) <sup>c</sup>     |
| LSTa     | 60                                             | 0.24 (0.18-0.30) <sup>a</sup> | 58                                             | 0.29 (0.23-0.44) <sup>a</sup>   | 45                                             | 0.33 (0.27-0.45) <sup>a</sup>   | 95                                            | 0.48 (0.34-0.78) <sup>b</sup>     |
| LSTb     | 99                                             | 0.80 (0.61-1.04) <sup>a</sup> | 99                                             | 1.21 (1.04-1.50) <sup>b</sup>   | 92                                             | 0.76 (0.62-0.93) <sup>a</sup>   | 100                                           | 2.21 (1.89-2.75) <sup>c</sup>     |
| LSTc     | 96                                             | 0.79 (0.46-1.42) <sup>a</sup> | 93                                             | 0.84 (0.42-1.33) <sup>a</sup>   | 92                                             | 0.71 (0.47-1.71) <sup>a</sup>   | 95                                            | 1.02 (0.76-1.82) <sup>a</sup>     |
| 3'-F-LNH | 98                                             | 3.46 (2.40-4.61) <sup>a</sup> | 99                                             | 4.63 (2.77-7.18) <sup>b</sup>   | 98                                             | 2.71 (2.05-4.76) <sup>a</sup>   | 100                                           | 10.5 (8.48-11.3) <sup>c</sup>     |
| 2'-F-LNH | 12                                             | 1.72 (1.17-2.45) <sup>a</sup> | 0                                              | -                               | 36                                             | 1.69 (1.04-3.19) <sup>a</sup>   | 0                                             | -                                 |

<sup>1</sup> Percentage of HM samples in which the specific HMOS was detected ( $\geq$ limit of quantification (LOQ)); <sup>2</sup> In only two samples, the respective HMOS was present and hence Q3 could not be calculated; <sup>a,b,c and d</sup> Different superscript letters indicate statistical significance (p<0.05). Significance values have been adjusted by the Bonferroni correction for multiple tests.

Abbreviations used: 2'-FL: 2'-fucosyllactose; 3-FL: 3-fucosyllactose; DFL: difucosyllactose; LNT: lacto-N-tetraose; LNnT: lacto-N-neotetraose; LNFP I: lacto-N-fucopentaose I; LNFP II: lacto-N-fucopentaose II; LNFP III: lacto-N-fucopentaose III; LNFP V: lacto-N-fucopentaose V; LNDFH I: lacto-N-

difucohexaose I; LNDFH II: lacto-N-difucohexaose II; 3'-SL: 3-sialyllactose; 6'-SL: 6-sialyllactose; DSLNT: disialyllacto-N-tetraose; LSTa: sialyl-lacto-N-tetraose a; LSTb: sialyl-lacto-N-tetraose b; LSTc: sialyl-lacto-N-tetraose c; 2'-F-LNH: 2'- fucosyllacto-N-hexaose; 3'-F-LNH: 3'-fucosyllacto-N-hexaose

**Supplemental Table S4.** Percentage of human milk (HM) samples (n=171) in which the specific human milk oligosaccharide (HMOS) was detected (Presence, % of total) and relative peak area (rPA, %) of the selected HMOS (median (Q1-Q3)) according to maternal HM group [4–6]. HM samples were collected longitudinally over the first year postpartum from 24 Dutch mothers.

|                     | HM Group I<br>(n = 126 Samples,<br>18 Donors) |                                 | HM Group II<br>(n = 21 Samples,<br>3 Donors) |                                 | HM Group III<br>(n = 15 Samples,<br>2 Donors) |                                 | HM Group IV<br>(n = 9 Samples,<br>1 Donor) |                                 |
|---------------------|-----------------------------------------------|---------------------------------|----------------------------------------------|---------------------------------|-----------------------------------------------|---------------------------------|--------------------------------------------|---------------------------------|
|                     | Presence<br>% of total <sup>1</sup>           | rPA (%)<br>Median (Q1-Q3)       | Presence<br>% of total <sup>1</sup>          | rPA (%)<br>Median (Q1-Q3)       | Presence<br>% of total <sup>1</sup>           | rPA (%)<br>Median (Q1-Q3)       | Presence<br>% of total <sup>1</sup>        | rPA (%)<br>Median (Q1-Q3)       |
| 2'-FL               | 100                                           | 22.3 (15.0-29.9) <sup>a</sup>   | 0                                            | -                               | 100                                           | 42.0 (35.5-53.0) <sup>b</sup>   | 0                                          | -                               |
| 3-FL                | 96                                            | 12.2 (6.29-21.7) <sup>a</sup>   | 100                                          | 35.9 (26.4-45.3) <sup>b</sup>   | 33                                            | 3.61 (3.04-4.40) <sup>c</sup>   | 100                                        | 6.78 (3.04-7.31) <sup>d</sup>   |
| DFL                 | 100                                           | 1.86 (1.29-2.50) <sup>a</sup>   | 0                                            | -                               | 100                                           | 1.01 (0.62-1.48) <sup>a</sup>   | 0                                          | -                               |
| LNT                 | 100                                           | 10.6 (7.87-13.1) <sup>a</sup>   | 100                                          | 15.3 (11.3-20.6) <sup>b</sup>   | 100                                           | 9.77 (6.50-13.8) <sup>a</sup>   | 100                                        | 51.8 (47.8-59.3) <sup>c</sup>   |
| LNnT                | 94                                            | 1.03 (0.73-1.51) <sup>a</sup>   | 71                                           | 0.73 (0.55-1.13) <sup>b</sup>   | 93                                            | 1.22 (0.96-1.80) <sup>a</sup>   | 100                                        | 1.35 (0.94-1.89) <sup>a,b</sup> |
| LNFP I+V            | 100                                           | 7.56 (3.29-12.5) <sup>a</sup>   | 100                                          | 1.51 (1.36-1.63)                | 100                                           | 18.8 (15.6-24.5) <sup>b</sup>   | 100                                        | 1.29 (1.16-1.55)                |
| LNFP II             | 100                                           | 5.79 (3.31-9.01) <sup>a</sup>   | 100                                          | 19.7 (17.1-21.2) <sup>b</sup>   | 0                                             | -                               | 0                                          | -                               |
| LNFP III            | 100                                           | 7.52 (5.66-9.12) <sup>a</sup>   | 100                                          | 9.28 (8.06-10.6) <sup>b</sup>   | 100                                           | 8.94 (6.99-12.3) <sup>a,b</sup> | 100                                        | 15.6 (10.1-18.4) <sup>b</sup>   |
| LNDFH I             | 100                                           | 16.3 (13.5-19.1) <sup>a</sup>   | 0                                            | -                               | 0                                             | -                               | 0                                          | -                               |
| LNDFH II            | 6.3                                           | 1.20 (1.04-1.85) <sup>a</sup>   | 90                                           | 3.91 (3.09-4.19) <sup>b</sup>   | 0                                             | -                               | 0                                          | -                               |
| 3'-SL               | 100                                           | 1.08 (0.78-1.43) <sup>a</sup>   | 100                                          | 1.37 (1.04-1.91) <sup>a</sup>   | 100                                           | 1.18 (1.04-2.15) <sup>a</sup>   | 100                                        | 1.76 (1.05-2.21) <sup>a</sup>   |
| 6'-SL               | 95                                            | 0.88 (0.52-1.66) <sup>a</sup>   | 95                                           | 0.74 (0.51-1.71) <sup>a</sup>   | 100                                           | 0.91 (0.37-1.62) <sup>a</sup>   | 100                                        | 1.74 (0.66-2.71) <sup>a</sup>   |
| DSLNT               | 100                                           | 1.97 (1.40-2.47) <sup>a</sup>   | 95                                           | 3.30 (2.91-3.75) <sup>b</sup>   | 100                                           | 2.95 (1.94-4.10) <sup>a,b</sup> | 100                                        | 5.53 (5.00-8.83) <sup>c</sup>   |
| LSTa                | 46                                            | 0.20 (0.17-0.28) <sup>a</sup>   | 33                                           | 0.26 (0.20-0.31) <sup>a</sup>   | 27                                            | 0.23 (0.21-0.42) <sup>a</sup>   | 100                                        | 0.78 (0.75-0.93) <sup>b</sup>   |
| LSTb                | 99                                            | 0.93 (0.69-1.08) <sup>a</sup>   | 100                                          | 1.43 (1.29-1.89) <sup>b</sup>   | 100                                           | 0.64 (0.51-0.98) <sup>a</sup>   | 100                                        | 2.36 (2.18-2.72) <sup>c</sup>   |
| LSTc                | 73                                            | 0.57 (0.27-1.08) <sup>a</sup>   | 57                                           | 0.70 (0.32-1.20) <sup>a</sup>   | 60                                            | 0.53 (0.29-0.77) <sup>a</sup>   | 89                                         | 1.17 (0.51-1.64) <sup>a</sup>   |
| 3'-F-LNH            | 93                                            | 2.49 (1.59-3.90) <sup>a</sup>   | 86                                           | 4.06 (1.23-6.82) <sup>a,b</sup> | 87                                            | 2.76 (1.75-4.37) <sup>a</sup>   | 100                                        | 7.46 (4.94-8.41) <sup>b</sup>   |
| 2'-F-LNH            | 16                                            | 1.00 (0.61-2.14) <sup>a</sup>   | 0                                            | -                               | 20                                            | 0.90 (0.32- ) <sup>3 a</sup>    | 0                                          | -                               |
| β3'-GL <sup>2</sup> | 83                                            | 0.087 (0.062-0.15) <sup>a</sup> | 95                                           | 0.11 (0.081-0.14) <sup>a</sup>  | 73                                            | 0.12 (0.11-0.13) <sup>a</sup>   | 100                                        | 0.42 (0.38-0.51) <sup>b</sup>   |
| β6'-GL <sup>2</sup> | 100                                           | 0.36 (0.25-0.53) <sup>a</sup>   | 100                                          | 0.52 (0.44-0.61) <sup>b</sup>   | 100                                           | 0.42 (0.38-1.01) <sup>a,b</sup> | 100                                        | 1.07 (0.87-1.36) <sup>c</sup>   |
| α3'-GL <sup>2</sup> | 1.6                                           | 0.18 (0.13- ) <sup>3 a</sup>    | 0                                            | -                               | 0                                             | -                               | 0                                          | -                               |

<sup>1</sup> Percentage of HM samples in which the specific HMOS was detected ( $\geq$ limit of quantification (LOQ)); <sup>2</sup> For β6'-GL, β3'-GL and α3'-GL, the limit of detection was defined at a signal-to-noise ratio (S/N) of 3. For all other HMOS, the limit of quantification was defined at an S/N of 10; <sup>3</sup> In only two samples, the respective HMOS was present and hence Q3 could not be calculated; <sup>a</sup>, <sup>b</sup>, <sup>c</sup> and <sup>d</sup> Different superscript letters indicate statistical significance (p<0.05). Significance values have been adjusted by the Bonferroni correction for multiple tests.

Abbreviations used: 2'-FL: 2'-fucosyllactose; 3-FL: 3-fucosyllactose; DFL: difucosyllactose; LNT: lacto-N-tetraose; LNnT: lacto-N-neotetraose; LNFP I: lacto-N-fucopentaose I; LNFP II: lacto-N-fucopentaose II; LNFP III: lacto-N-fucopentaose III; LNFP V: lacto-N-fucopentaose V; LNDFH I: lacto-N-difucohexaose I; LNDFH II: lacto-N-difucohexaose II; 3'-SL: 3-sialyllactose; 6'-SL: 6-sialyllactose; DSLNT: disialyllacto-N-tetraose; LSTa: sialyl-lacto-N-tetraose a; LSTb: sialyl-lacto-N-tetraose b; LSTc: sialyl-lacto-N-tetraose c; 2'-F-LNH: 2'-fucosyllacto-N-hexaose; 3'-F-LNH: 3'-fucosyllacto-N-hexaose;  $\beta$ 3'-GL:  $\beta$ 3'-galactosyllactose;  $\beta$ 6'-GL:  $\beta$ 6'-galactosyllactose;  $\alpha$ 3'-GL:  $\alpha$ 3'-galactosyllactose.

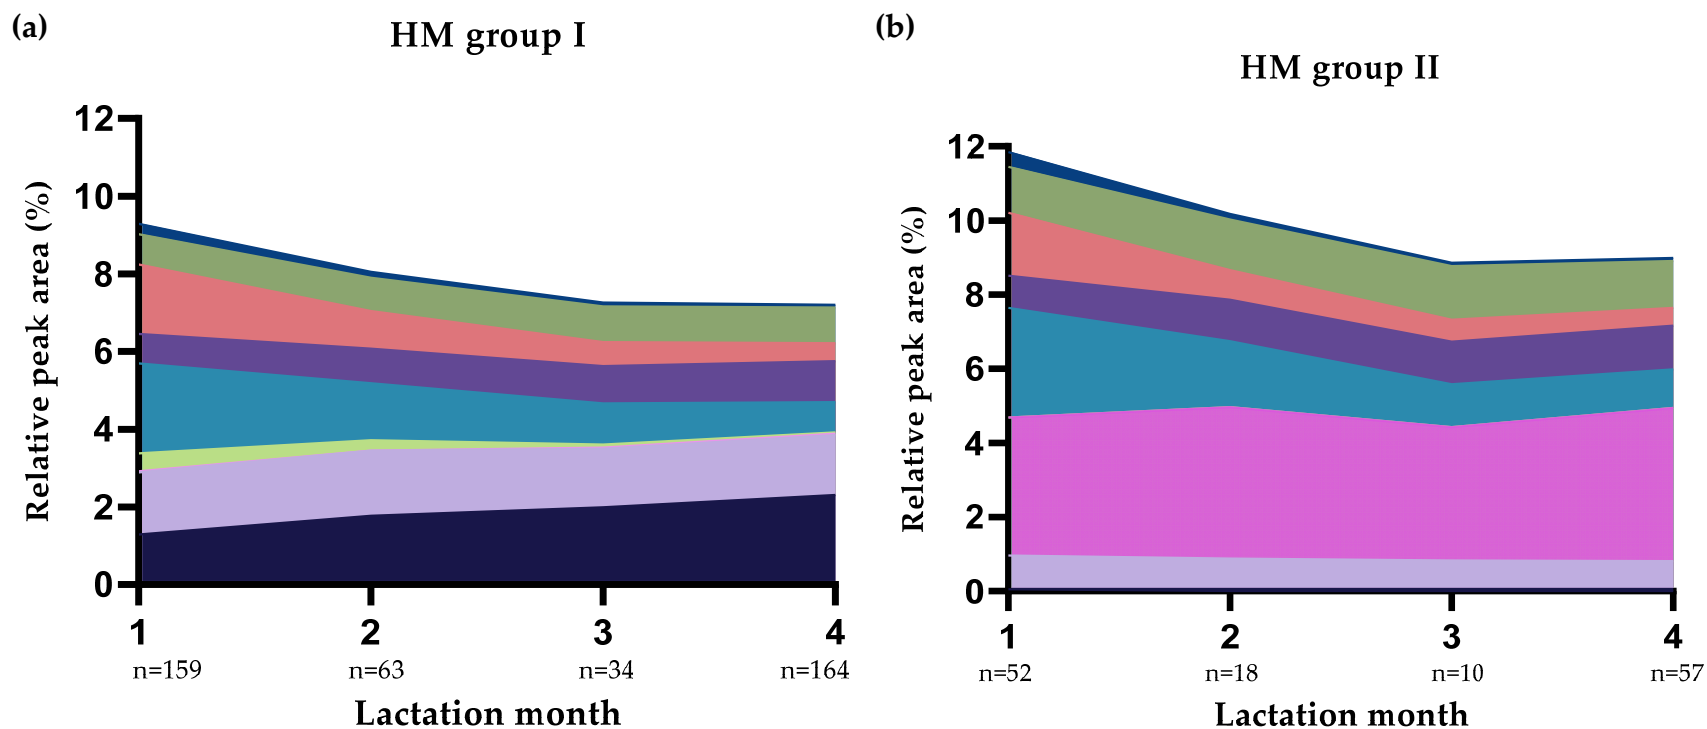



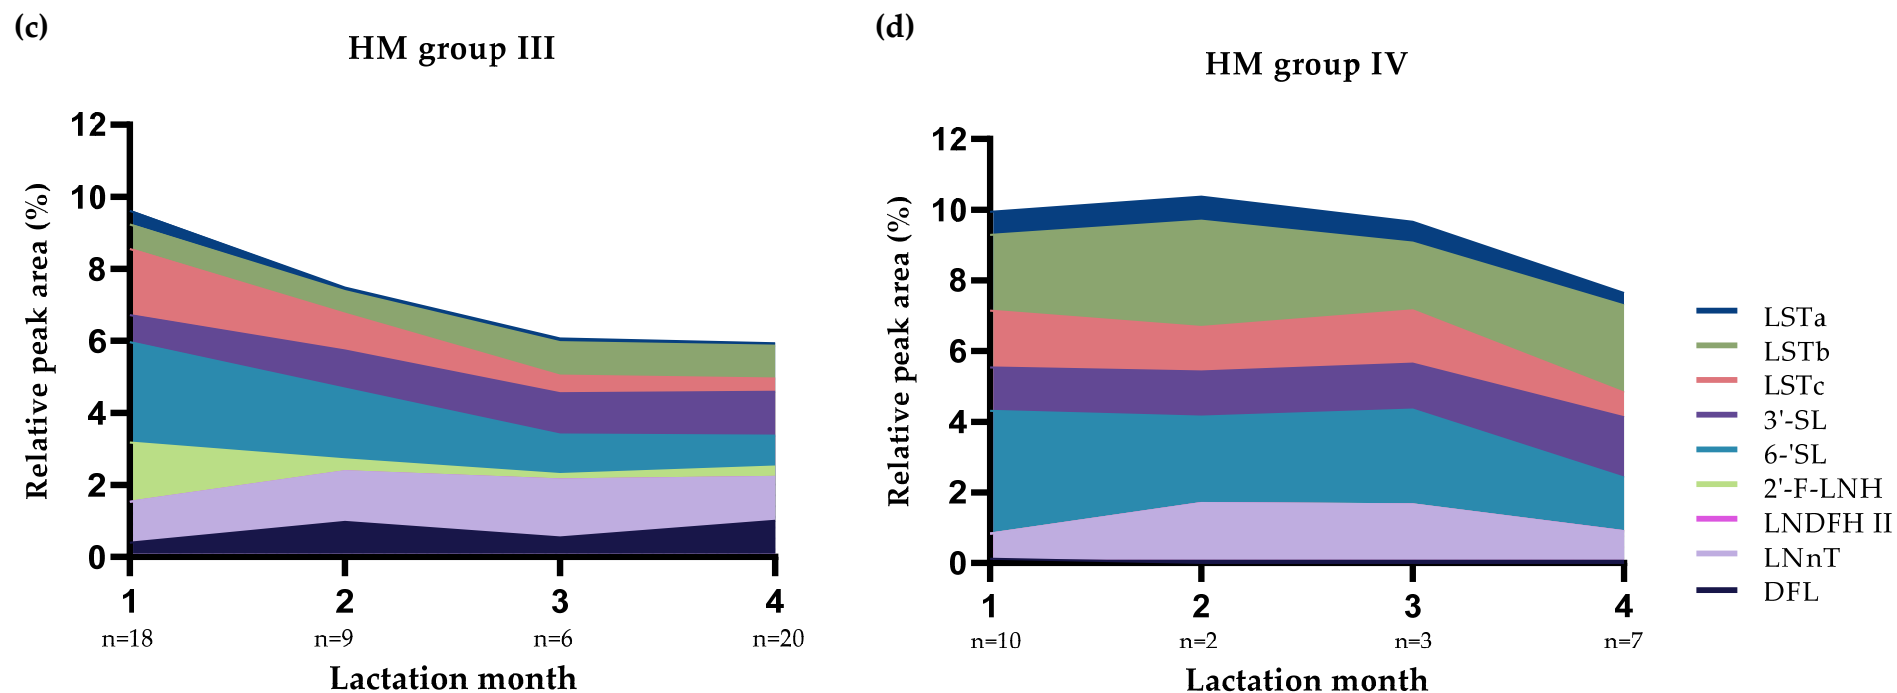

**Supplemental Figure S1.** Median relative peak areas (rPA) of low-abundant human milk oligosaccharides (HMOS) in the human milk (HM) samples (n=635) collected in the first 4 months of lactation according to HM group [4–6] and lactation stage. (a) HM group I; (b): HM group II; (c): HM group III and (d): HM group IV. Three samples could not be assigned to a HM group and are for this reason not depicted in these figures.

## References

1. Kottler R, Mank M, Hennig R, Müller-Werner B, Stahl B, Reichl U, et al. Development of a high-throughput glycoanalysis method for the characterization of oligosaccharides in human milk utilizing multiplexed capillary gel electrophoresis with laser-induced fluorescence detection. *Electrophoresis*. 2013;34(16):2323-36.
2. Melnik LA, Krysenko DA. Ultrapure Water: Properties, Production, and Use. *J Water Chem Tech*. 2019;41:143-50.
3. Ullsten S, Danielsson R, Backstrom D, Sjöberg P, Bergquist J. Urine profiling using capillary electrophoresis-mass spectrometry and multivariate data analysis. *Journal of chromatography A*. 2006;1117(1):87-93.
4. Stahl B, Thurl S, Henker J, Siegel M, Finke B, Sawatzki G. Detection of four human milk groups with respect to Lewis-blood-group-dependent oligosaccharides by serologic and chromatographic analysis. *Advances in experimental medicine and biology*. 2001;501:299-306.
5. Thurl S, Henker J, Siegel M, Tovar K, Sawatzki G. Detection of four human milk groups with respect to Lewis blood group dependent oligosaccharides. *Glycoconj J*. 1997;14(7):795-9.
6. Thurl S, Munzert M, Henker J, Boehm G, Müller-Werner B, Jelinek J, et al. Variation of human milk oligosaccharides in relation to milk groups and lactational periods. *Br J Nutr*. 2010;104(9):1261-71.
